# Supplementary material for: The analysis of the efficacy and safety of stereotactic body radiotherapy with sequential immune checkpoint inhibitors in the management of oligoprogressive advanced non-small cell lung cancer
Source: PubMed Central journal article supplement — Transl Cancer Res. 2024 May 7;13(5):2408–18. doi: 10.21037/tcr-23-2232 (PMC11170538; doi:10.21037/tcr-23-2232), 2024-05-07
Supplement: tcr-13-05-2408-dss.pdf [file tcr-13-05-2408-dss.pdf]

## Data Sharing Statement

|                     |                                                                                                                                                     |                                                                                                                                           |
|---------------------|-----------------------------------------------------------------------------------------------------------------------------------------------------|-------------------------------------------------------------------------------------------------------------------------------------------|
| <b>Article Info</b> | <a href="https://dx.doi.org/10.21037/tcr-23-2232">https://dx.doi.org/10.21037/tcr-23-2232</a>                                                       |                                                                                                                                           |
| <b>Item</b>         | <b>Question</b>                                                                                                                                     | <b>Authors' Response<br/>(place "-" if not applicable)</b>                                                                                |
| 1                   | Would you like to share data collected for your study to others?                                                                                    | Yes                                                                                                                                       |
| 2                   | If not, would you like to share the reason for your decision?                                                                                       | -                                                                                                                                         |
| 3                   | What data in particular will be shared?                                                                                                             | The survival data in particular will be shared.                                                                                           |
| 4                   | Any other documents will be shared? Such as study protocol, statistical analysis plan, informed consent form, clinical study report, analytic code. | None of the above.                                                                                                                        |
| 5                   | When will data availability begin?                                                                                                                  | From the publication date.                                                                                                                |
| 6                   | When will data availability end?                                                                                                                    | One year within the publication date, since the technique or survival data may be updated over time.                                      |
| 7                   | To whom will you share the data?                                                                                                                    | Oncologists interested in relevant research.                                                                                              |
| 8                   | For what type of analysis or purpose?                                                                                                               | For analysis to assess the efficacy of SBRT combined with ICIs therapy on oligoprogression in driver-negative non-small cell lung cancer. |
| 9                   | How or where can the data/documents be obtained?                                                                                                    | Emails could be sent to the address below to obtain the shared data:<br>yingxixi202308@163.com                                            |
| 10                  | Any other restrictions?                                                                                                                             | We may balance the potential benefits and risks for each request and then provide the data that could be shared.                          |
